# Supplementary material for: Relativistic Kinematic Effects in the Interaction Time of Whistler-Mode Chorus Waves and Electrons in the Outer Radiation Belt
Source: Copernicus journal article supplement (doi:10.5194/angeo-2023-6), 2023-02-28
Supplement: Supplementary file [file angeo-2023-6-AC1-supplement.pdf]

**Table 1.** Input parameters used in the Equations of sections 2, 3, and 4 to calculate the chorus wave-particle time of interaction and the pitch angle diffusion coefficient for cases 1 to 4.  $K_{res} = 1$  MeV and the initial equatorial pitch angle is  $60^\circ$ . For each case, the first (second) line shows results for parallel (antiparallel) propagating wave and electron. The subscript  $r$  and  $nr$  means relativistic and non-relativistic, respectively.

| Input parameters |               |                        |               |                | Results       |                  |                          |                               |
|------------------|---------------|------------------------|---------------|----------------|---------------|------------------|--------------------------|-------------------------------|
| Cases            | $B_0$<br>[nT] | $n_e$<br>[ $cm^{-3}$ ] | $B_w$<br>[nT] | $\tau$<br>[ms] | $T_r$<br>[ms] | $T_{nr}$<br>[ms] | $D_{aa}$<br>[ $s^{-1}$ ] | $D_{aa}^{nr}$<br>[ $s^{-1}$ ] |
| 1                | 234           | 2.3                    | 0.16          | 0.2            | 0.04          | 0.02             | 7.87                     | 1.67                          |
|                  |               |                        |               |                | 0.03          | 0.01             | 4.32                     | 0.80                          |
| 2                | 166           | 3.0                    | 0.20          | 1.80           | 0.37          | 0.14             | 9.1                      | 1.68                          |
|                  |               |                        |               |                | 0.33          | 0.14             | 6.8                      | 2.76                          |
| 3                | 112           | 9.1                    | 0.40          | 2.0            | 0.10          | 0.06             | 2.09                     | 1.45                          |
|                  |               |                        |               |                | 0.11          | 0.06             | 2.55                     | 1.28                          |
| 4                | 86            | 4.3                    | 0.24          | 5.0            | 0.41          | 0.16             | 1.95                     | 0.54                          |
|                  |               |                        |               |                | 0.42          | 0.16             | 2.08                     | 0.43                          |

Cases 1 (Tu et al., 2014) - from 8 October 2012 (dropout). Cases 3 and 4 (Liu et al., 2020) - 22 December 2014, 00:00 - 06:00 (UTC)
